# Supplementary material
Source: ML conference proceedings conference paper supplement (https://openaccess.thecvf.com/content/CVPR_2019/html/Zhu_ScratchDet_Training_Single-Shot_CVPR_2019_paper.html)
Supplement: Supplementary file 2 [file Zhu_ScratchDet_Training_Single-Shot_CVPR_2019_supplemental.pdf]

# ScratchDet: Training Single-Shot Object Detectors from Scratch

## -Supplementary Material-

Rui Zhu<sup>1,4\*</sup>, Shifeng Zhang<sup>2\*</sup>, Xiaobo Wang<sup>1</sup>, Longyin Wen<sup>3</sup>, Hailin Shi<sup>1†</sup>, Liefeng Bo<sup>3</sup>, Tao Mei<sup>1</sup>

<sup>1</sup>JD AI Research, China; <sup>2</sup>CASIA, UCAS, China; <sup>3</sup>JD Digits, USA; <sup>4</sup>Sun Yat-sen University, China  
{zhurui10, wangxiaobo8, longyin.wen, shihailin, liefeng.bo, tmei}@jd.com, shifeng.zhang@nlpr.ia.ac.cn

### 1. Complete Object Detection Results

We show the complete object detection results of the proposed ScratchDet method on the PASCAL VOC 2007 test set, PASCAL VOC 2012 test set and MS COCO test-dev set in Table 1, Table 2 and Table 3, respectively. Among the results of all published methods, our ScratchDet achieves the best performance on these three detection datasets, *i.e.*, 86.3% mAP on the PASCAL VOC 2007 test set, 86.3% mAP on the PASCAL VOC 2012 test set and 39.1% AP on the MS COCO test-dev set. And we select some detection examples on the PASCAL VOC 2007 test set, the PASCAL VOC 2012 test set and the MS COCO test-dev in Figure 1, Figure 2, and Figure 3, respectively. Different colors of the bounding boxes indicate different object categories. Our method works well with the occlusions, truncations, inter-class interference and clustered background.

Table 1. Object detection results on the PASCAL VOC 2007 test set. All models use Root-ResNet-34 as the backbone network.

| Method         | Data       | mAP  | aero | bike | bird | boat | bottle | bus  | car  | cat  | chair | cow  | table | dog  | horse | mbike | person | plant | sheep | sofa | train | tv   |
|----------------|------------|------|------|------|------|------|--------|------|------|------|-------|------|-------|------|-------|-------|--------|-------|-------|------|-------|------|
| ScratchDet300  | 07+12      | 80.4 | 86.0 | 87.7 | 77.8 | 73.9 | 58.8   | 87.4 | 88.4 | 88.2 | 66.4  | 84.3 | 78.4  | 84.0 | 87.5  | 88.3  | 83.6   | 57.3  | 80.3  | 79.9 | 87.9  | 81.2 |
| ScratchDet300+ | 07+12      | 84.1 | 90.0 | 89.2 | 83.6 | 80.0 | 70.1   | 89.3 | 89.5 | 89.0 | 73.0  | 86.9 | 79.8  | 87.4 | 90.1  | 89.3  | 87.1   | 63.3  | 86.9  | 83.5 | 88.9  | 83.4 |
| ScratchDet300  | COCO+07+12 | 84.0 | 87.9 | 89.3 | 85.6 | 79.8 | 69.4   | 89.1 | 89.2 | 88.5 | 73.2  | 87.5 | 81.7  | 88.4 | 89.5  | 88.7  | 86.3   | 63.1  | 84.5  | 84.3 | 88.1  | 85.6 |
| ScratchDet300+ | COCO+07+12 | 86.3 | 90.4 | 89.6 | 88.4 | 85.4 | 78.9   | 90.1 | 89.3 | 89.5 | 77.4  | 89.7 | 83.9  | 89.1 | 90.3  | 89.5  | 88.3   | 68.1  | 87.6  | 85.9 | 87.4  | 87.7 |

Table 2. Object detection results on the PASCAL VOC 2012 test set. All models use Root-ResNet-34 as the backbone network.

| Method         | Data        | mAP  | aero | bike | bird | boat | bottle | bus  | car  | cat  | chair | cow  | table | dog  | horse | mbike | person | plant | sheep | sofa | train | tv   |
|----------------|-------------|------|------|------|------|------|--------|------|------|------|-------|------|-------|------|-------|-------|--------|-------|-------|------|-------|------|
| ScratchDet300  | 07++12      | 78.5 | 90.1 | 86.8 | 74.5 | 66.3 | 54.0   | 83.7 | 82.6 | 91.6 | 64.1  | 83.1 | 67.7  | 90.1 | 87.6  | 87.8  | 85.7   | 56.9  | 81.7  | 74.6 | 87.2  | 75.3 |
| ScratchDet300+ | 07++12      | 83.6 | 92.2 | 90.3 | 82.6 | 73.9 | 68.1   | 86.8 | 90.5 | 93.9 | 70.3  | 88.0 | 72.3  | 92.3 | 91.5  | 91.0  | 90.3   | 63.6  | 87.6  | 77.4 | 89.9  | 80.2 |
| ScratchDet300  | COCO+07++12 | 82.1 | 91.7 | 89.3 | 79.1 | 71.9 | 62.7   | 85.7 | 85.3 | 93.9 | 68.8  | 87.2 | 68.7  | 91.9 | 90.6  | 90.9  | 88.2   | 61.2  | 84.7  | 79.2 | 89.7  | 81.0 |
| ScratchDet300+ | COCO+07++12 | 86.3 | 94.0 | 91.8 | 86.0 | 78.9 | 75.6   | 88.6 | 91.3 | 95.1 | 74.0  | 90.0 | 73.0  | 93.6 | 93.0  | 92.6  | 91.9   | 69.7  | 90.2  | 80.9 | 91.8  | 83.7 |

Table 3. Object detection results on the MS COCO test-dev set. All models use Root-ResNet-34 as the backbone network.

| Method         | AP   | AP <sub>50</sub> | AP <sub>75</sub> | AP <sub>S</sub> | AP <sub>M</sub> | AP <sub>L</sub> | AR <sub>1</sub> | AR <sub>10</sub> | AR <sub>100</sub> | AR <sub>S</sub> | AR <sub>M</sub> | AR <sub>L</sub> |
|----------------|------|------------------|------------------|-----------------|-----------------|-----------------|-----------------|------------------|-------------------|-----------------|-----------------|-----------------|
| ScratchDet300  | 32.7 | 52.2             | 34.9             | 13.0            | 35.6            | 49.0            | 29.3            | 43.9             | 45.7              | 20.6            | 50.8            | 65.3            |
| ScratchDet300+ | 39.1 | 59.2             | 42.6             | 23.1            | 43.5            | 51.0            | 33.1            | 53.3             | 58.3              | 36.6            | 63.4            | 74.5            |

\*Equally-contributed and this work is done at JD AI Research.

†Corresponding author.

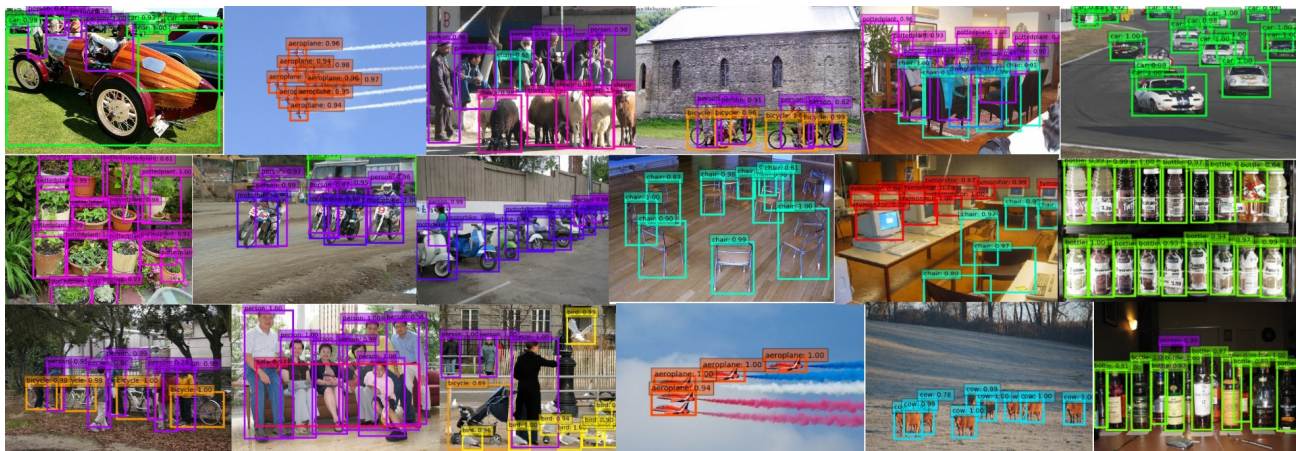

Figure 1. Qualitative results of ScratchDet300 on the PASCAL VOC 2007 test set (corresponding to 84.0% mAP). The training data is 07+12+COCO.

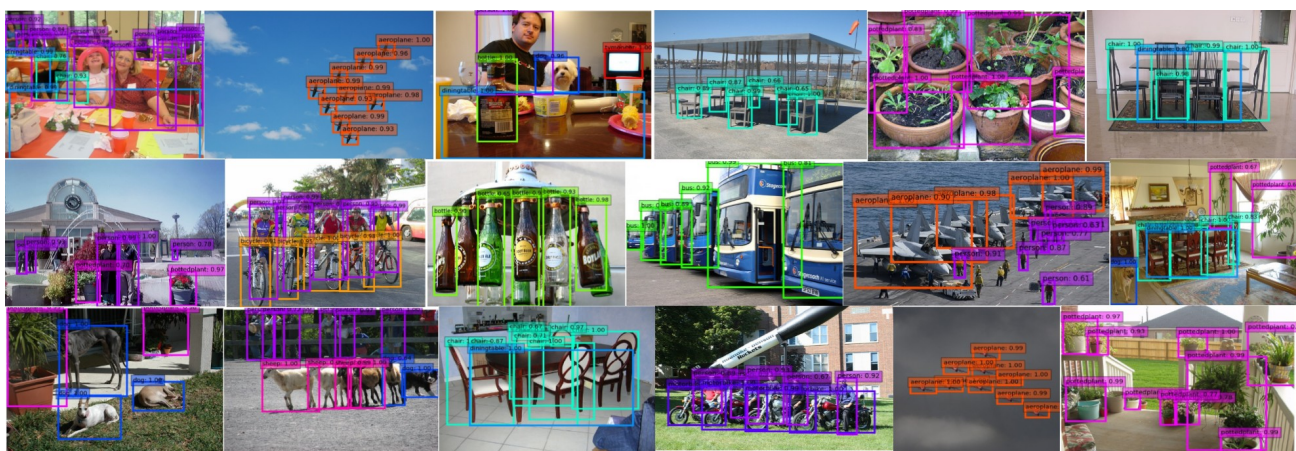

Figure 2. Qualitative results of ScratchDet300 on the PASCAL VOC 2012 test set (corresponding to 82.1% mAP). The training data is 07++12+COCO.



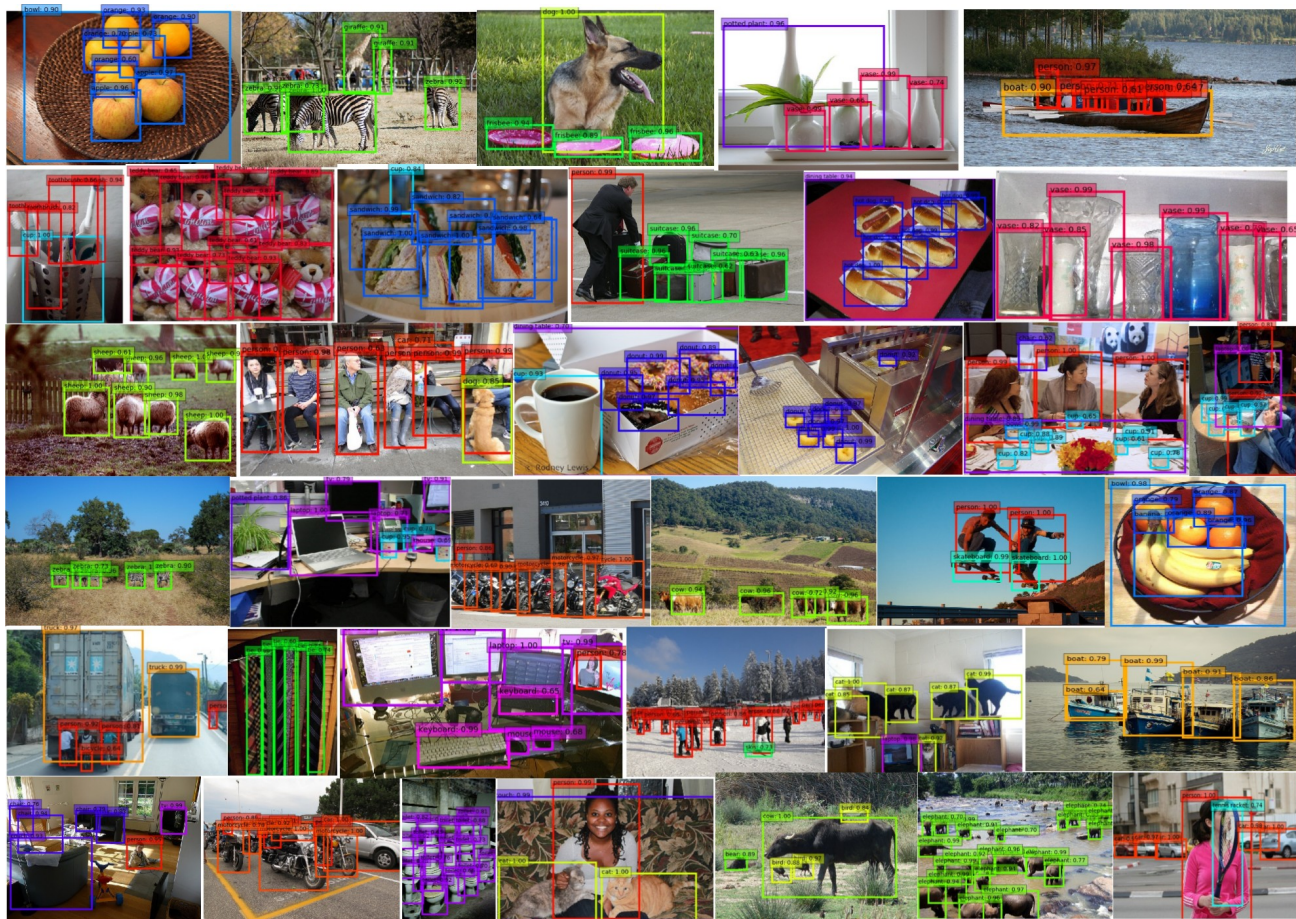

Figure 3. Qualitative results of ScratchDet300 on the MS COCO test-dev set (corresponding to 32.7% mAP). The training data is COCO trainval35k.

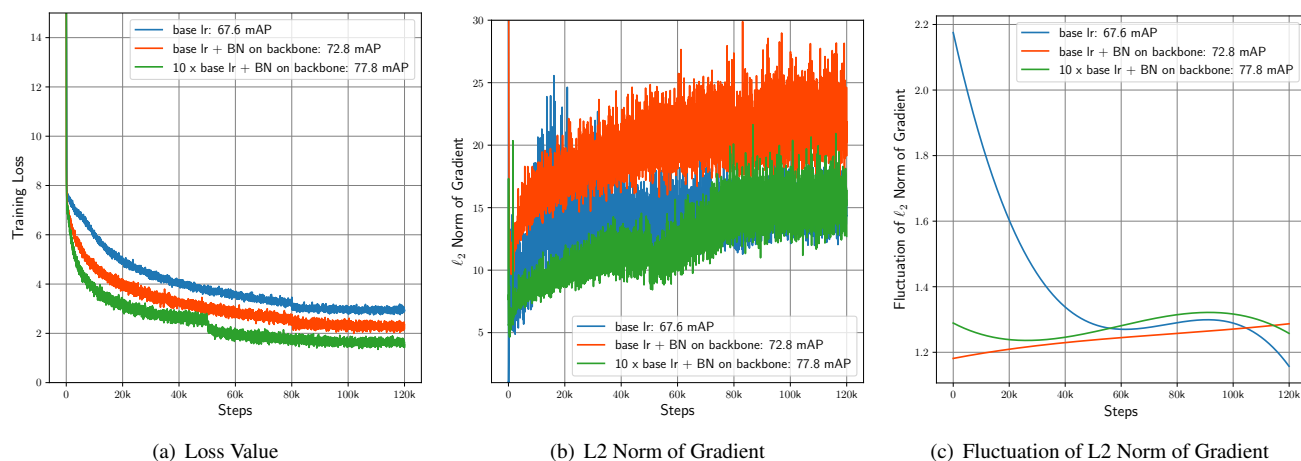

Figure 4. Analysis of the optimization landscape of SSD after adding BatchNorm on the backbone subnetwork. We plot (a) the training loss value, (b) L2 Norm of gradient and (c) the fluctuation of L2 Norm of gradient of three detectors. The blue curve represents the original SSD, the red and green curves represent the SSD trained with BatchNorm on the backbone network using base learning rate and  $10\times$  base learning rate, respectively. It is the similar trend with the curves of adding BatchNorm on the detection head subnetwork.

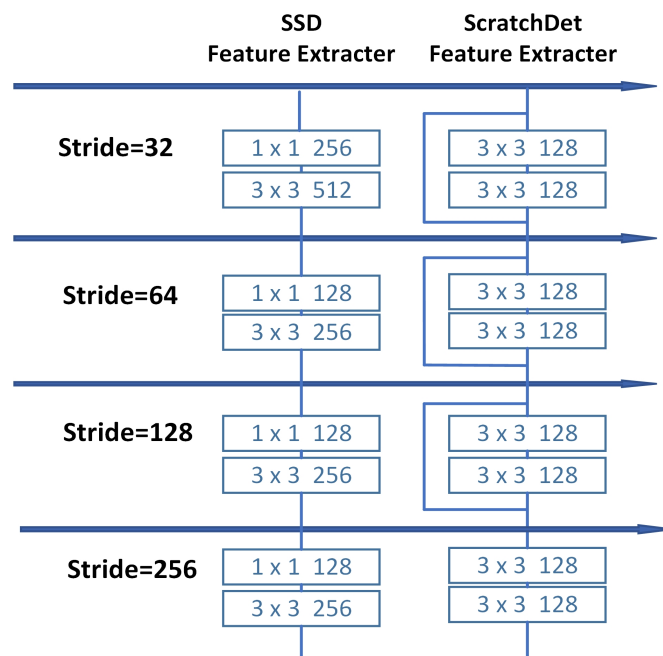

Figure 5. Comparison of the extra added layers between SSD and ScratchDet. This change brings less parameters and computations.
